# Supplementary material for: The Nature of the Spark Is a Pivotal Element in the Design of a Miller–Urey Experiment
Source: MDPI journal article supplement (doi:10.3390/life13112201), 2023-11-12
Supplement: s1 [file s1]

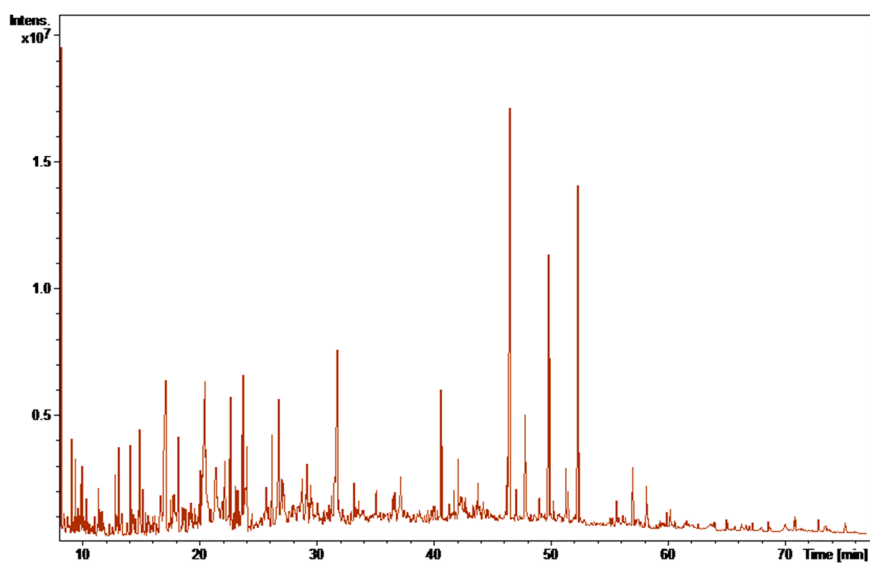

**Figure S1.** The TIC chromatogram of the miller soup volatile compounds obtained from GC-MS

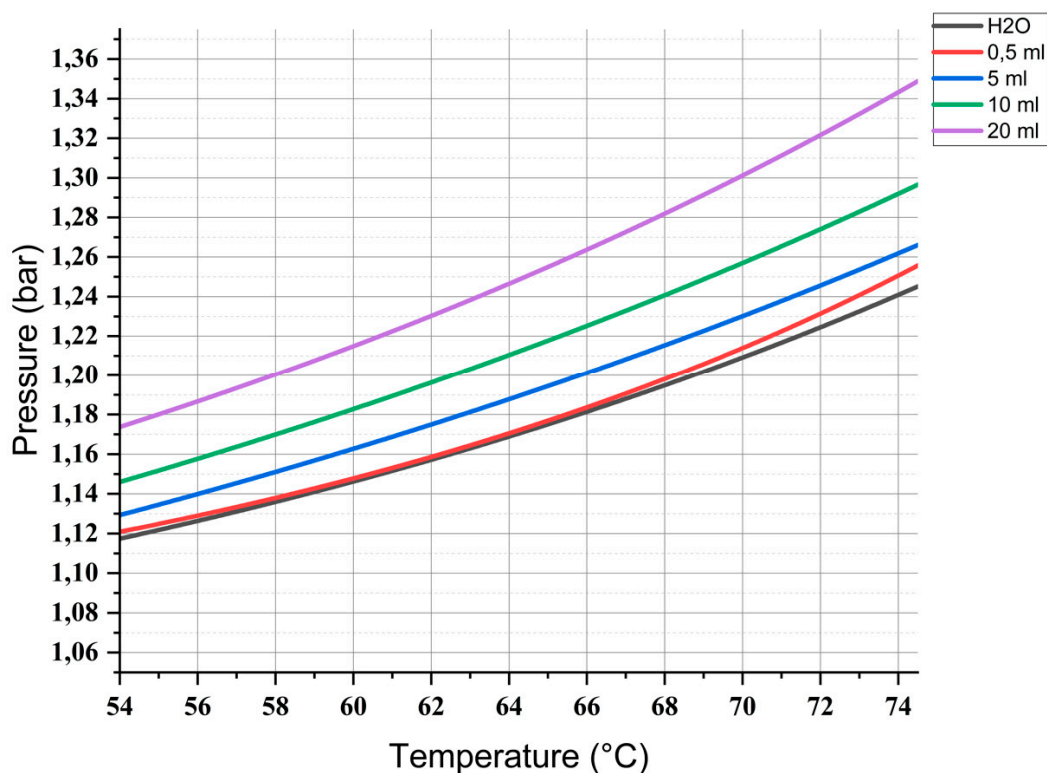

**Figure S2.** Pressure in the reactor as a function of temperature for different added amounts of 35% ammonia/water solution (see insert, H<sub>2</sub>O means no ammonia added). Pressure corresponds the total pressure within the reactor in equilibrium. Temperature corresponds to the actual temperature in the middle of the reactor. ( $P_{\text{atm}} = 0.9896 \text{ Bar}$ ,  $T = 22 \pm 2 \text{ }^{\circ}\text{C}$ )

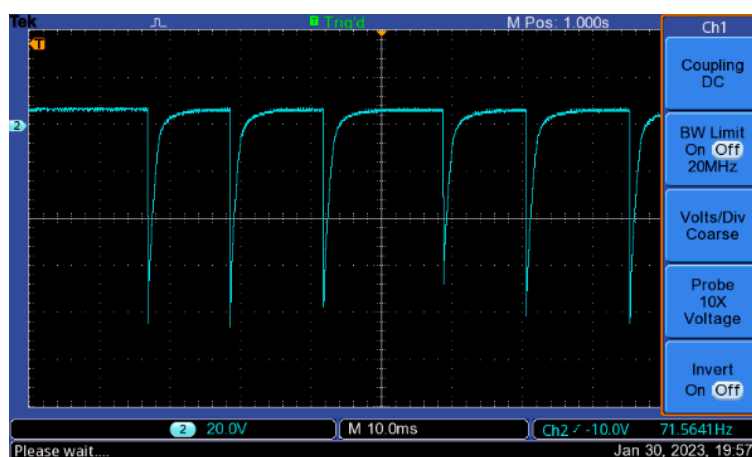

Figure S3. Voltage-time characterization of FB-1

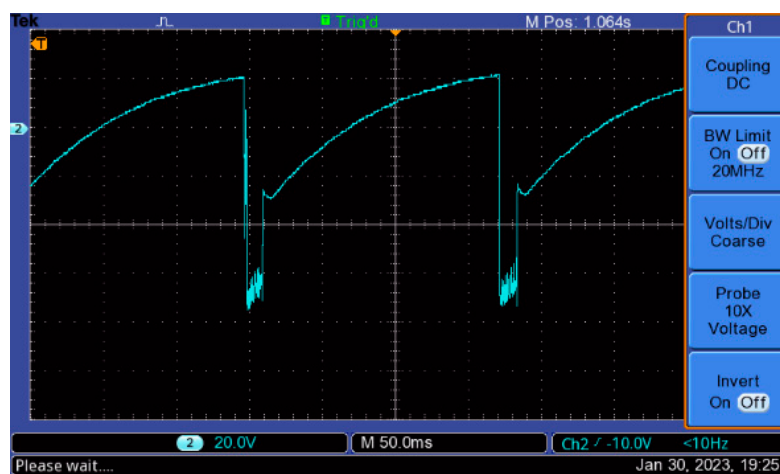

Figure S4. Voltage-time characterization of FB-2

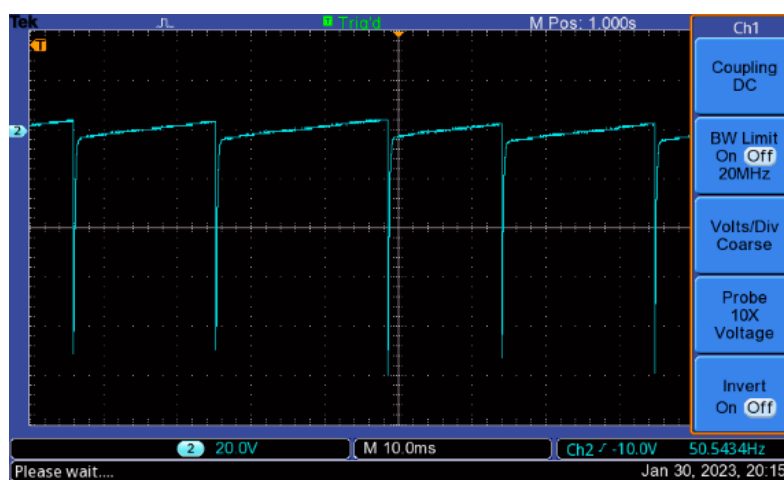

Figure S5. Voltage-time characterization of CA-1

Figures S.3-S5. Voltage as a function of time for spark generators FB-1, FB-2 and CA-1. The sudden breakdowns in tension correspond to spark generation.

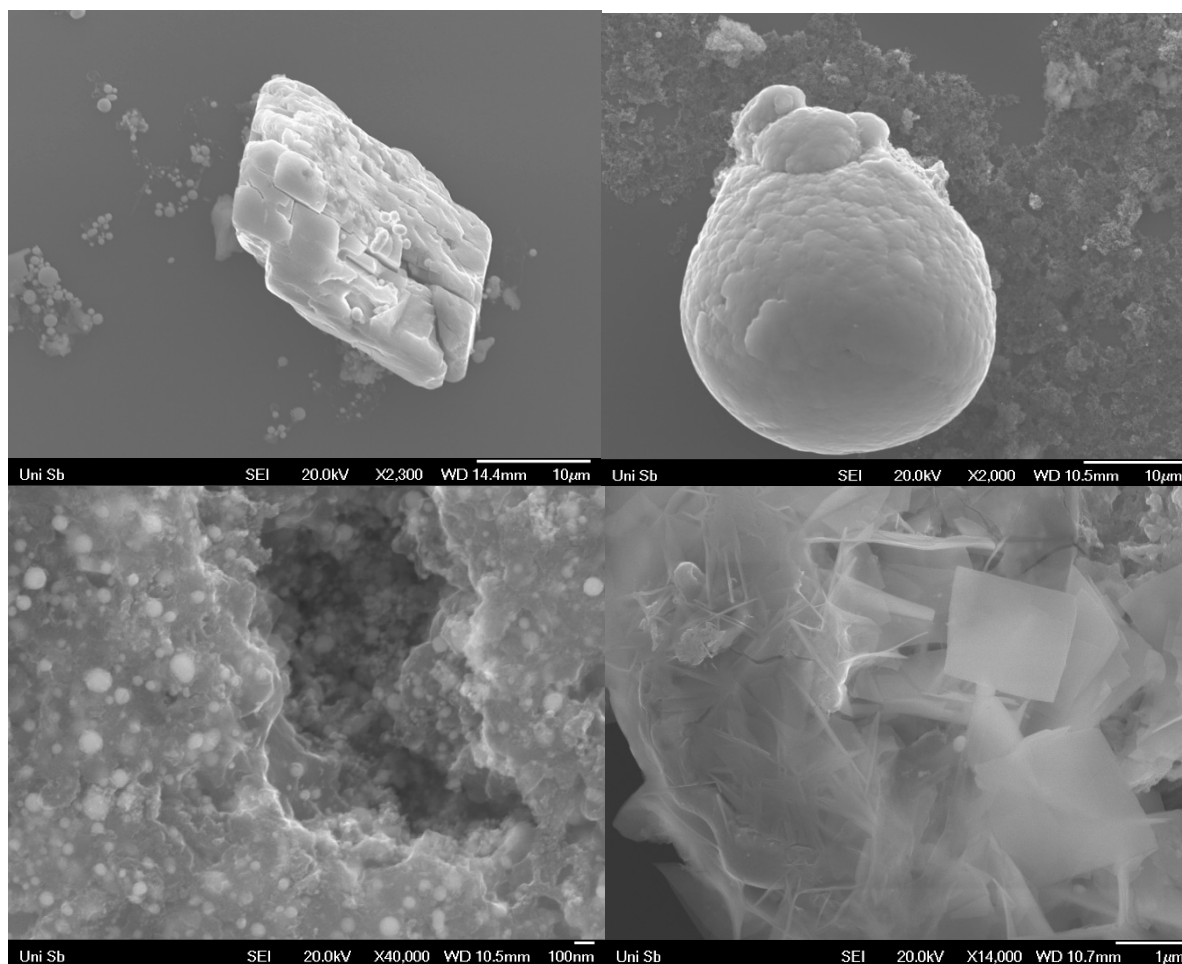

**Figure S6.** SEM pictures of Black material

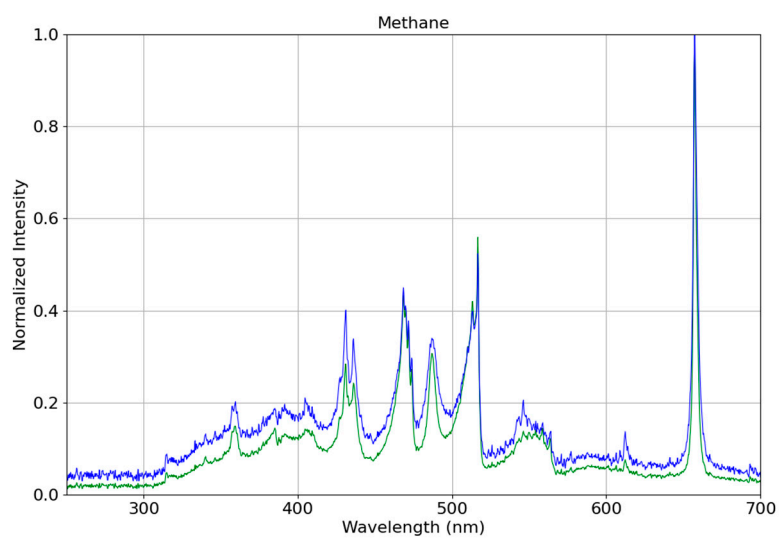

**Figure S7.** The methane excitation spectrum of spark generators FB-1 (blue) and FB-2 (green).

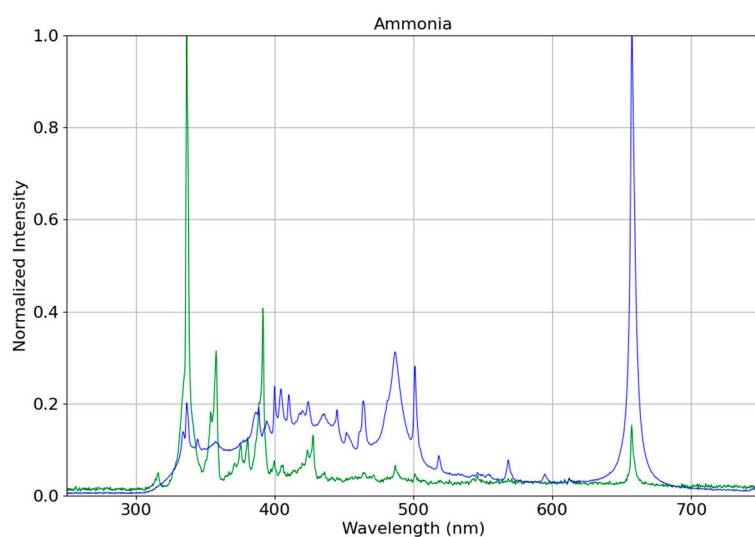

**Figure S8.** The ammonia excitation spectrum of spark generators FB-1 (blue) and FB-2 (green).

**Table S1.** The 20 most abundance fragments as observed by GC/MS

| Experiment # | Fragments abundance decrease (m/z) → |     |     |     |     |     |     |     |     |     |     |     |     |     |     |     |     |     |     |     |
|--------------|--------------------------------------|-----|-----|-----|-----|-----|-----|-----|-----|-----|-----|-----|-----|-----|-----|-----|-----|-----|-----|-----|
| Sample 1     | 73                                   | 117 | 75  | 132 | 313 | 129 | 57  | 221 | 43  | 145 | 147 | 71  | 341 | 355 | 85  | 55  | 281 | 131 | 41  | 69  |
| Sample 2     | 117                                  | 73  | 75  | 132 | 313 | 129 | 57  | 43  | 145 | 71  | 341 | 55  | 85  | 41  | 131 | 69  | 185 | 314 | 133 | 118 |
| Sample 3     | 117                                  | 73  | 75  | 132 | 313 | 129 | 57  | 43  | 145 | 71  | 341 | 85  | 55  | 41  | 131 | 69  | 314 | 133 | 118 | 201 |
| Sample 4     | 73                                   | 221 | 75  | 117 | 222 | 263 | 57  | 43  | 147 | 132 | 71  | 129 | 313 | 223 | 74  | 133 | 85  | 145 | 205 | 131 |
| Sample 5     | 73                                   | 165 | 75  | 147 | 180 | 117 | 221 | 330 | 175 | 45  | 129 | 43  | 74  | 114 | 128 | 166 | 132 | 257 | 100 | 243 |
| Sample 6     | 165                                  | 73  | 180 | 75  | 166 | 149 | 175 | 117 | 147 | 43  | 57  | 45  | 221 | 74  | 71  | 132 | 98  | 181 | 129 | 167 |
| Sample 7     | 117                                  | 73  | 341 | 75  | 132 | 129 | 145 | 57  | 43  | 55  | 342 | 131 | 71  | 226 | 69  | 133 | 41  | 85  | 201 | 118 |
| Sample 8     | 73                                   | 165 | 147 | 75  | 117 | 180 | 43  | 45  | 149 | 166 | 131 | 74  | 129 | 59  | 330 | 221 | 116 | 57  | 71  | 103 |

**Table S2.** Spark generator electrical characteristics

| Spark generators        | FB-1    | FB-2    | CA-1     |
|-------------------------|---------|---------|----------|
| V input                 | 19.00 V | 15.00 V | 11.50 kV |
| I input                 | 0.100 A | 0.500 A | 0.107 mA |
| V Output (kV)           | 9       | 10      | 11       |
| Sparking frequency (Hz) | 71      | 10      | 50       |

**Table S3.** Number of assigned compounds by GC/MS

| Experiment # | Number of assigned compounds |
|--------------|------------------------------|
| Sample 1     | 140                          |
| Sample 2     | 154                          |
| Sample 3     | 351                          |
| Sample 4     | 261                          |
| Sample 5     | 330                          |
| Sample 6     | 124                          |
| Sample 7     | 305                          |
| Sample 8     | 160                          |

Table S4. Assigned compounds by GC/MS

| Sub-molecular class affiliation examples | Assigned structure                                                                                                                                              | Prob. | NIST N. |
|------------------------------------------|-----------------------------------------------------------------------------------------------------------------------------------------------------------------|-------|---------|
| Amines                                   | 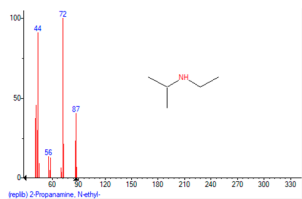 <p>(mz44) 2-Propanamine, N-ethyl</p>                                          | 70.0  | 77935   |
|                                          |  <p>(mz226) N-(2,2,6,6-tetramethyl-1,3-oxybis(4-phenyl)butanediol)-1-amine</p> | 10.4  | 350495  |
|                                          |  <p>(mz172) N-(3-methylbutyl)hexanamide</p>                                    | 83.7  | 408867  |
|                                          |  <p>(mz144) Urea, N-ethyl</p>                                                 | 82.9  | 96499   |
|                                          |  <p>(mz244) N-Butyl-2,4-dihydroxy-1,3-bis(tert-butyl) ether</p>              | 54.9  | 53512   |
|                                          |  <p>(mz132) 2-Nitro-1,1,3,3-tetraphenylpropane</p>                           | 68.5  | 112363  |
|                                          |  <p>(mz127) 2,4-imidazolidinedione, 1,5,5-trimethyl</p>                      | 37.6  | 62814   |

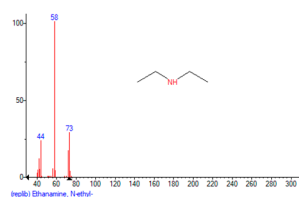

32.3

108362

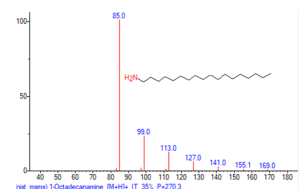

50.2

95529

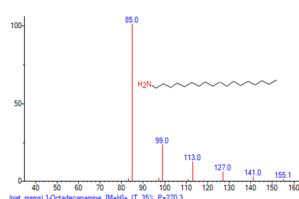

51.7

9374

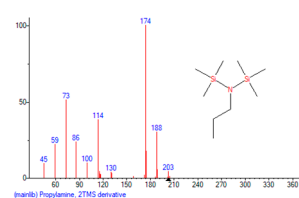

13.9

213850

Urea

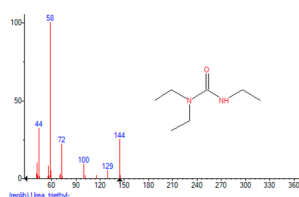

76.7

103776

Fatty acids

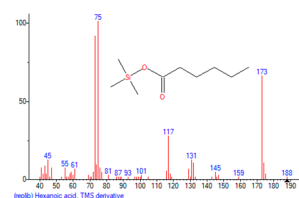

75.2

299366

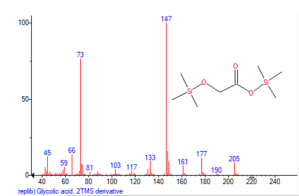

86.6

123654

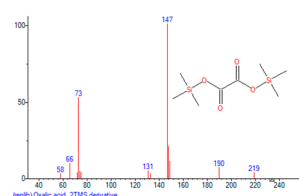

34.1

32847

Fatty alcohols

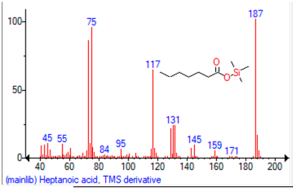

96.9 226308

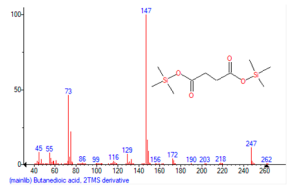

38.7 719422

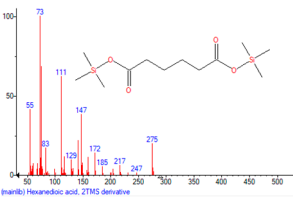

78.7 78965

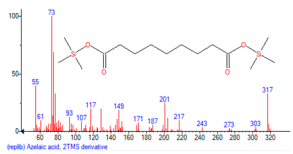

75.9 36218

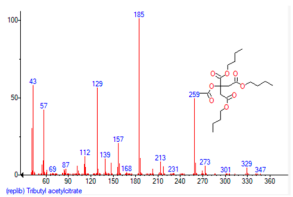

93.2 6856862

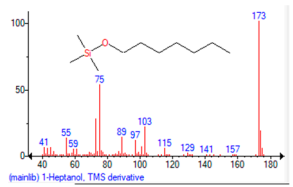

88.5 196061

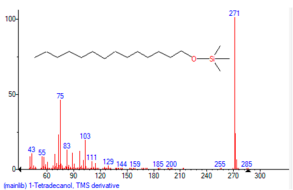

64.8 207261

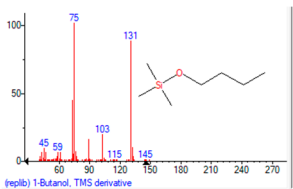

29.7 1227418



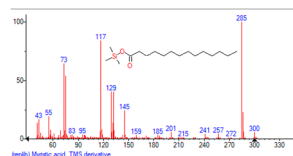

62.7

510592

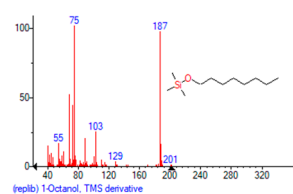

74.1

385924

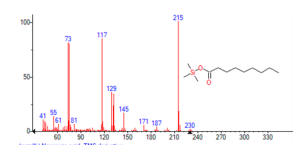

98.5

379255

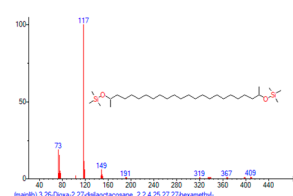

10.1

94899

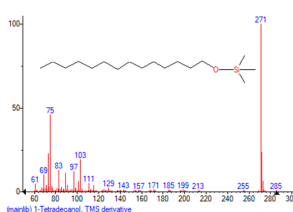

25.1

73173

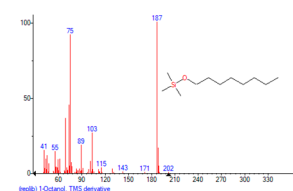

75.0

406733

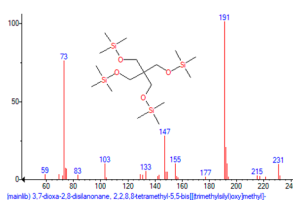

59.4

98774

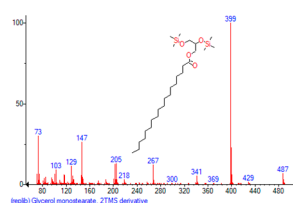

47.0

57600

## Aromatics

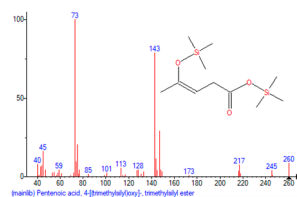

64.8

237792

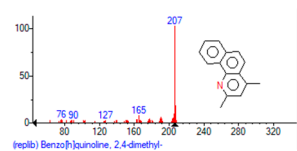

16.2

17819

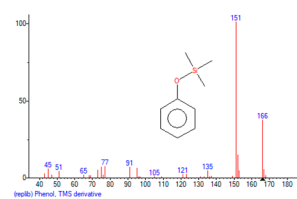

80.2

760495

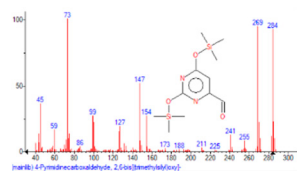

69.5

24956

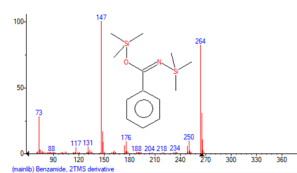

96.7

417798

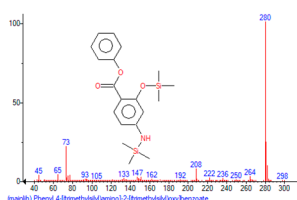

53.3

166876

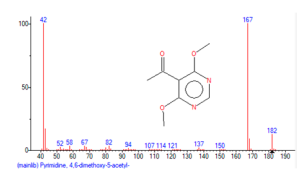

98.3

74292

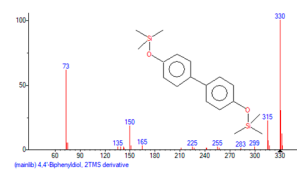

82.1

15405

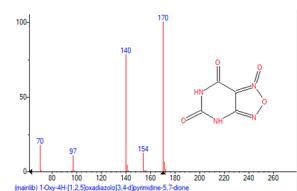

63.4

71420

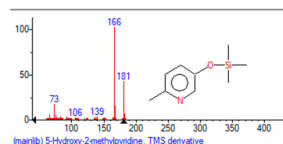

36.7

59448

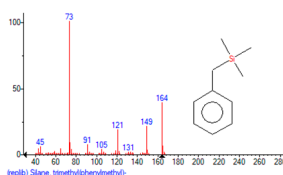

44.10

71467

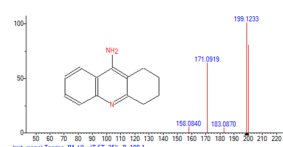

26.0

78787

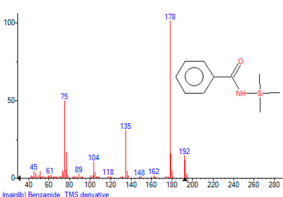

92.8

339015

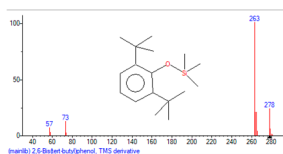

80.4

624192

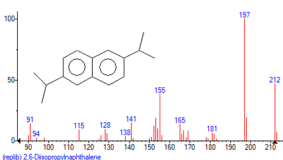

48.6

26593

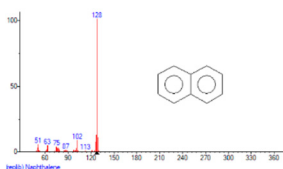

47.5

379701

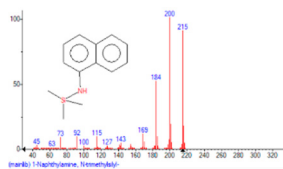

94.8

417695

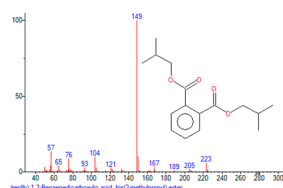

12.8

814787

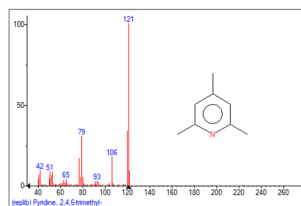

96.3

1719783

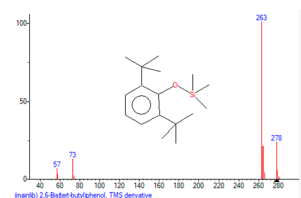

81.1

686938

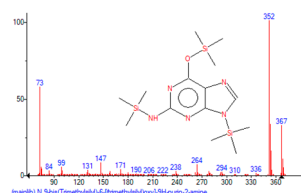

84.8

189227

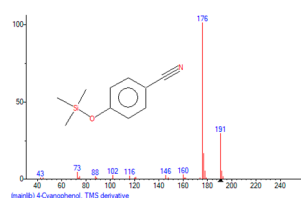

93.8

1376725

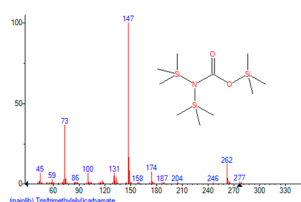

79.8

2170001

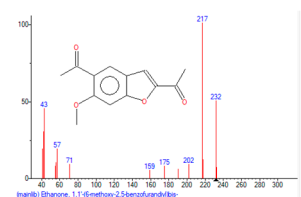

71.7

143403

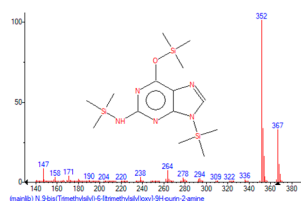

80.0

28854

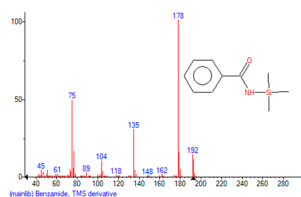

92.8

339015

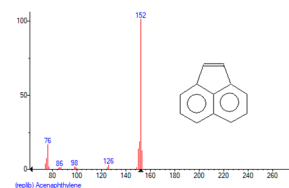

70.3

36439

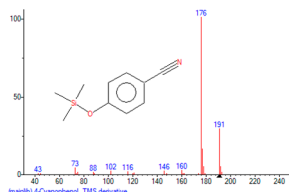

42.8

4644168

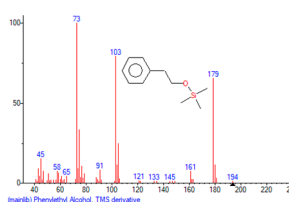

89.0

1041722

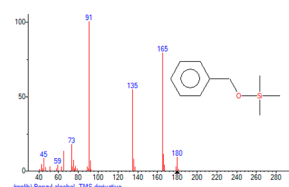

75.0

374100

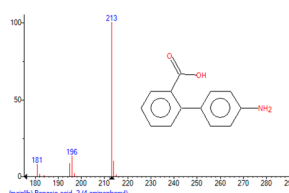

57.7

65246

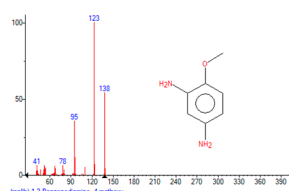

36.4

160871

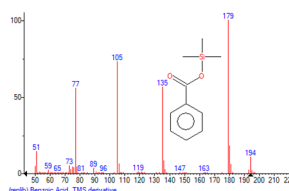

68.0

87963

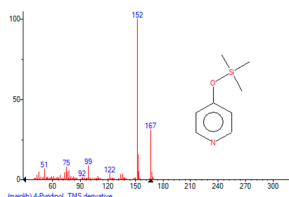

71.9

756386

PAHs

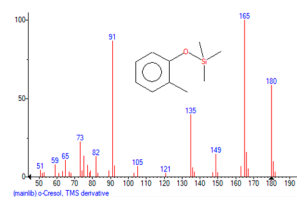

66.4

23903

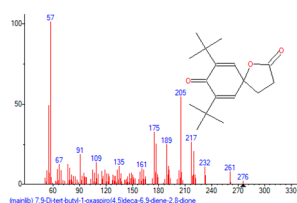

90.9

60506

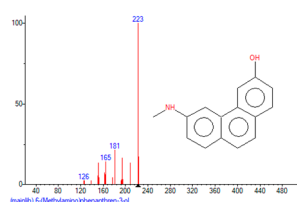

29.7

103705

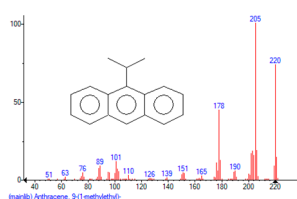

16.6

115574

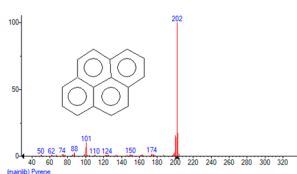

65.9

227992

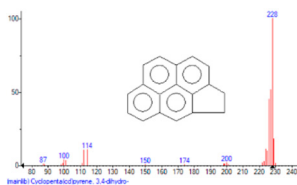

71.9

74738

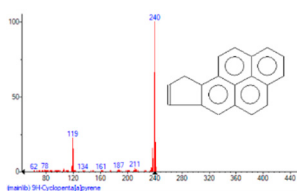

97.3

326095

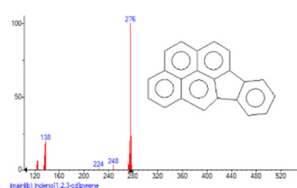

60.7

114983

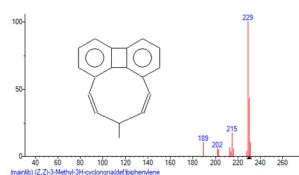

86.6

147978

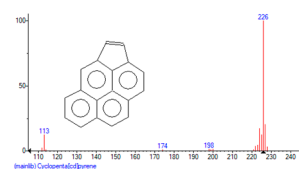

60.1

74739

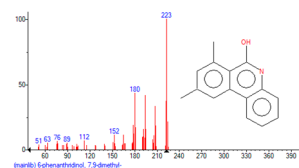

95.4

396294

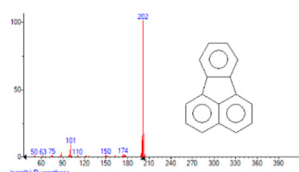

72.5

228362

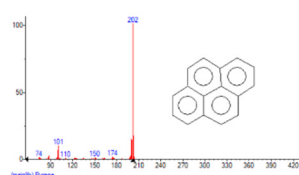

41.4

227992

## Amides

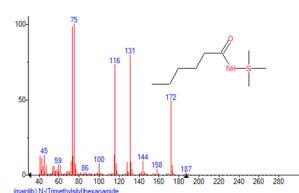

48.3

289197

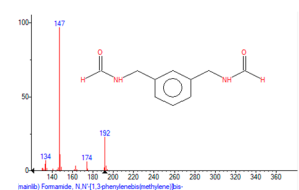

43.5

202417

## Amino acids

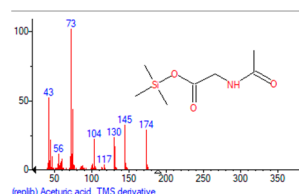

40.5

275909

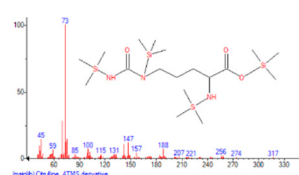

31.4

17846

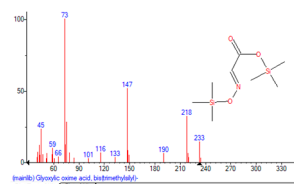

29.7

78864

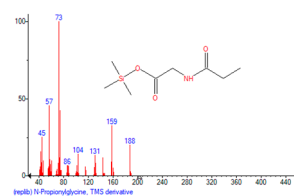

31.0

960881

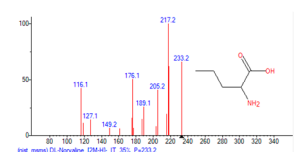

20.0

21164

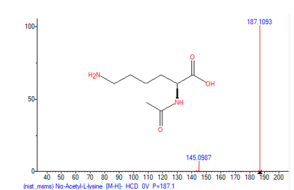

71.1

186737

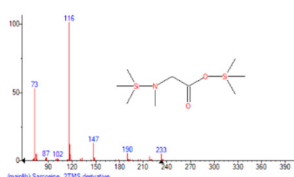

26.1

153975

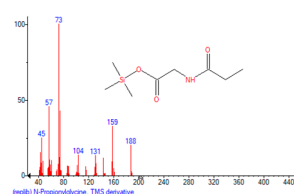

40.3

835375

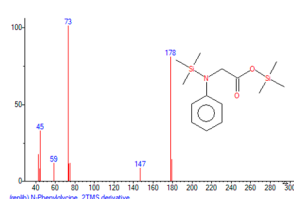

30.1

484429

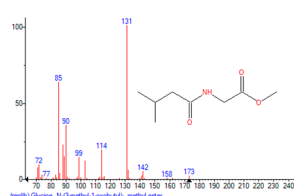

35.4

111238

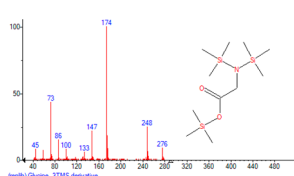

35.2

158658



Saturated hydrocarbons

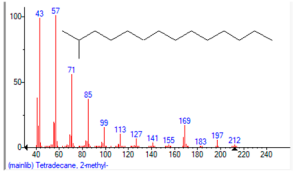

19.3

707968

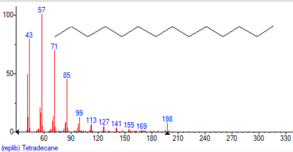

35.5

1589508

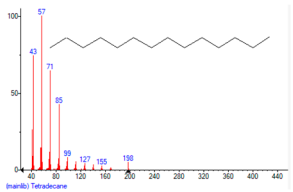

30.3

1950172

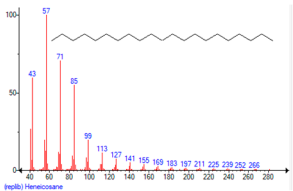

8.14

4520627

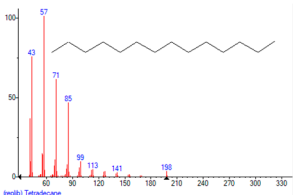

43.1

1527630

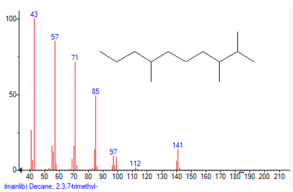

62.4

17267

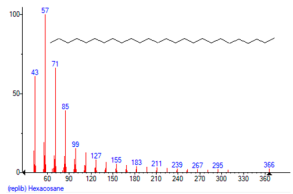

21.8

304116

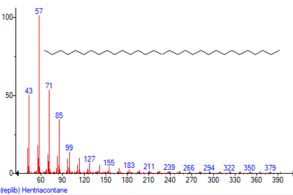

15.0

654619

## Others

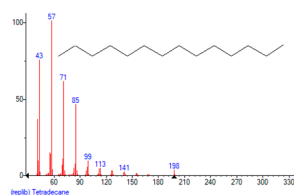

41.9

1506272

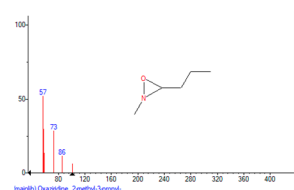

31.1

18533

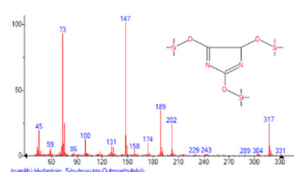

80.9

149425

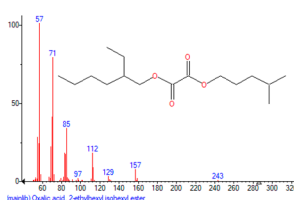

12.5

85426

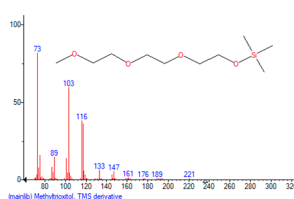

35.4

11325

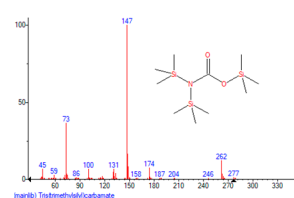

86.4

8057243

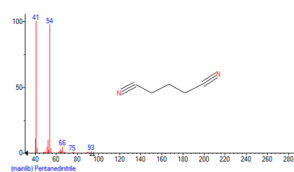

87.1

2330325

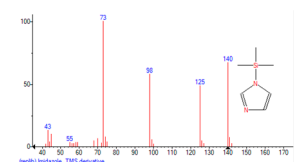

94.0

161540

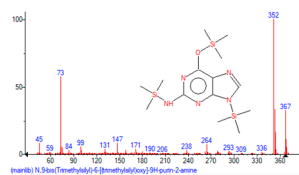

77.7

333943

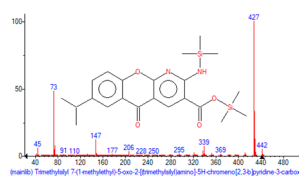

54.3

408271

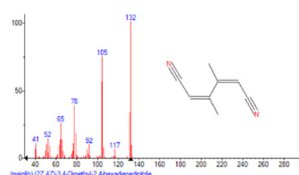

69.5

210603

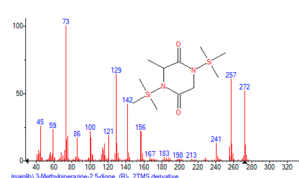

80.0

333700

Note: PAHs refer to polycyclic Aromatic Hydrocarbons.
